# Supplementary material
Source: Research Square preprint supplement (doi:10.21203/rs.3.rs-9167685/v1)
Supplement: Supplementary file 1 [file 424b6dc2c89f90c8e1a30235.docx]

**Table 1: The posterior mean, median and mode of various variance components and genetic parameters for body weight at different age of Chokla sheep [standard deviations (PSD) of marginal posterior distribution of mean estimates are in brackets]**

| **Trait** | **Items** | **Mean (PSD)** | **Median** | **Mode** | **HPD** | **MCE** |
| --- | --- | --- | --- | --- | --- | --- |
| **BW** | σam | -0.041(0.007) | -0.041 | -0.042 | -0.053to (-0.025) | 0.0005 |
| h2 | 0.151(0.028) | 0.151 | 0.156 | 0.098-0.208 | 0.0021 |
| m2 | 0.286(0.020) | 0.286 | 0.270 | 0.251-0.323 | 0.0010 |
| c2 |  |  |  |  |  |
| WW  6W  9W | h2t | 0.083 |  |  |  |  |
| tm | 0.182 |  |  |  |  |
| σam | - | - | - | - | - |
| h2 | 0.134(0.024) | 0.133 | 0.117 | 0.091-0.181 | 0.0017 |
| m2 | 0.039(0.013) | 0.039 | 0.039 | 0.015-0.067 | 0.0020 |
| c2 | 0.023(0.013) | 0.021 | 0.018 | 0.001-0.047 | 0.0025 |
| h2t | 0.154 | - | - | - | - |
| tm | 0.095 | - | - | - | - |
| σam | -3.401(0.409) | -3.402 | -3.447 | -4.338 to -2.7040 | 0.0359 |
| h2 | 0.381(0.028) | 0.3831 | 0.394 | 0.329-0.436 | 0.0019 |
| m2 | 0.112(0.014) | 0.112 | 0.113 | 0.087-0.141 | 0.0014 |
| c2 |  |  |  |  |  |
| h2t | 0.147 | **-** | **-** | **-** | **-** |
| tm | 0.014 | **-** | **-** | **-** | **-** |
| σam | -3.345(0.450) | -3.333 | -3.308 | -4.280 to-2.498 | 0.0379 |
| h2 | 0.408(0.029) | 0.408 | 0.409 | 0.353 -0.464 | 0.0016 |
| m2 | 0.116(0.018) | 0.116 | 0.115 | 0.079-0.150 | 0.0019 |
| c2 | 0.003(0.004) | 0.001 | 0.0008 | 0.00003-0.011 | 0.0010 |
| **YW** | h2t | 0.166 | - | - | - | - |
| tm | 0.022 | - | - | - | - |
| σam | -3.650(0.428) | -3.660 | -3.524 | -4.435 to-2.782 | 0.0287 |
| h2 | 0.405(0.029) | 0.405 | 0.386 | 0.355-0.468 | 0.0016 |
| m2 | 0.128(0.018) | 0.127 | 0.118 | 0.098-0.170 | 0.0023 |
| c2 | 0.014(0.011) | 0.012 | 0.002 | 0.0006-0.0355 | 0.0029 |
| h2t | 0.143 | - | - | - | - |
| tm | 0.026 | - | - | - | - |

h2 is heritability; c2 is σ2c /σ2p; m2 maternal heritability is σ2m /σ2p; σam – direct-maternal genetic covariance; tm is maternal across year repeatability for ewe performance; h2t is total heritability; PSD- posterior standard deviation; HPD- high probability density; MCE- monte carlo error

**Table 2: The posterior mean, median and mode of various variance components and genetic parameters for average daily gain of Chokla sheep [standard deviations (PSD) of marginal posterior distribution of mean estimates are in brackets]**

| **Trait** | **Items** | **Mean(PSD)** | **Median** | **Mode** | **HPD** | **MCE** |
| --- | --- | --- | --- | --- | --- | --- |
| **ADG1** | σam | -191.11(30.464) | -191.00 | -186.19 | -249.30 to -132.10 | 2.1352 |
| h2 | 0.315(0.035) | 0.316 | 0.322 | 0.248- 0.387 | 0.0020 |
| m2 | 0.133(0.020) | 0.134 | 0.143 | 0.092-0.169 | 0.0026 |
| c2 | 0.017(0.010) | 0.016 | 0.019 | 0.002-0.035 | 0.0017 |
| **ADG2**  ADG3 | h2t | 0.107 | - | - | - | - |
| tm | 0.046 | - | - | - | - |
| σam | -212.31 (24.136) | -211.40 | -223.75 | -259.60 to -162.50 | 1.2680 |
| h2 | 0.376(0.030) | 0.376 | 0.366 | 0.320-0.439 | 0.0015 |
| m2 | 0.099(0.009) | 0.099 | 0.099 | 0.083- 0.119 | 0.0007 |
| c2 |  |  |  |  |  |
| h2t | 0.136 | **-** | **-** | **-** | **-** |
| tm | 0.001 | **-** | **-** | **-** | **-** |
| σam | -46.791 (7.079) | -46.440 | -45.543 | -60.280 to-33.700 | 0.6585 |
| h2 | 0.310(0.032) | 0.310 | 0.296 | 0.247-0.365 | 0.0018 |
| m2 | 0.128(0.016) | 0.129 | 0.131 | 0.098-0.159 | 0.0019 |
| c2 | 0.006(0.005) | 0.004 | 0.001 | 0.0001-0.0160 | 0.0007 |
|  | h2t | 0.077 | - | - | - | - |
| tm | 0.014 | - | - | - | - |

Footnote same as Table 1

**Table 3: The posterior mean, median and mode of various variance components and genetic parameters for kleiber ratio of Chokla sheep [standard deviations (PSD) of marginal posterior distribution of mean estimates are in brackets]**

| **Trait** | **Items** | **Mean(PSD)** | **Median** | **Mode** | **HPD** | **MCE** |
| --- | --- | --- | --- | --- | --- | --- |
| **KR1**  **KR2**  **KR3** | σam | -0.588(0.109) | -0.584 | -0.542 | -0.797 to-0.361 | 0.0077 |
| h2 | 0.331(0.039) | 0.332 | 0.330 | 0.258 -0.408 | 0.0022 |
| m2 | 0.113(0.019 | 0.115 | 0.111 | 0.076-0.152 | 0.0025 |
| c2 | 0.010(0.008) | 0.008 | 0.001 | 0.0003-0.0262 | 0.0016 |
| h2t | 0.153 | - | - | - | - |
| tm | 0.050 | - | - | - | - |
| σam | -1.442 (0.188) | -1.436 | -1.447 | -1.823-(-1.111) | 0.0268 |
| h2 | 0.371(0.031) | 0.372 | 0.389 | 0.305-0.425 | 0.0014 |
| m2 | 0.111(0.014) | 0.111 | 0.109 | 0.085-0.140 | 0.0031 |
| c2 |  |  |  |  |  |
| h2t | 0.124 | **-** | **-** | **-** | **-** |
| tm | .002 | **-** | **-** | **-** | **-** |
| σam | -0.267(0.044) | -0.269 | -0.270 | -0.351-(-0.182) | 0.0030 |
| h2 | 0.324(0.037) | 0.326 | 0.310 | 0.244-0.385 | 0.0022 |
| m2 | 0.123(0.021) | 0.123 | 0.114 | 0.084-0.164 | 0.0028 |
| c2 |  |  |  |  |  |
| h2t | 0.096 | **-** | **-** | **-** | **-** |
| tm | 0.011 | **-** | **-** | **-** | **-** |

Footnote same as Table 1
